# Supplementary material for: DNA G-Quadruplex-Binding Protein Developed Using the RGG Domain of Translocated in Liposarcoma/Fused in Sarcoma Inhibits Transcription of bcl-2
Source: PubMed Central journal article supplement — ACS Omega. 2023 Mar 9;8(11):10459–65. doi: 10.1021/acsomega.3c00050 (PMC10035022; doi:10.1021/acsomega.3c00050), 2023-03-09
Supplement: ao3c00050_si_001.pdf [file ao3c00050_si_001.pdf]

## SUPPLEMENTARY DATA

### DNA G-Quadruplex-Binding Protein Developed Using the RGG Domain of Translocated in Liposarcoma/Fused in Sarcoma Inhibits Transcription of *bcl-2*

*Luthfi Lulul Ulum<sup>1</sup>, Yamato Karikome<sup>2</sup>, Ryota Yagi<sup>2</sup>, Tomoe Kawashima<sup>2</sup>, Akinori Ishihara<sup>2</sup>, and Takanori Oyoshi<sup>1,2,3\*</sup>*

<sup>1</sup>Graduate School of Science and Technology, Shizuoka University, 836 Ohya Suruga, Shizuoka, 422-8529, Japan, <sup>2</sup>Graduate School of Integrated Science and Technology, Shizuoka University, 836 Ohya Suruga, Shizuoka, 422-8529, Japan, <sup>3</sup>Research Institute of Green Science and Technology, Shizuoka University, 836 Ohya Suruga, Shizuoka, 422-8529, Japan

## Experimental Section

**Sodium Dodecyl Sulfate-Polyacrylamide Gel Electrophoresis (SDS-PAGE):** RGGF and GST-nucleolin RBDs-RGG were analyzed by sodium dodecyl sulfate-polyacrylamide gel electrophoresis in 12% (RGGF) and 8% (GST-nucleolin RBDs-RGG) gel, respectively.

**Circular Dichroism Spectroscopy:** Circular dichroism (CD) spectra of oligo 5 was recorded on a model J-820 instrument (Jasco, Japan). The CD spectra of oligo 5 (0.2 mM base concentration) in 100 mM KCl and 50 mM Tris-HCl (pH 7.5) was recorded using a 0.2-cm pathlength cell at 20°C. The spectrum of the corresponding buffer was subtracted, and this data was not further processed (e.g., by smoothing).

**Melting temperature ( $T_m$ ) measurement:** Melting profile of Oligo 5 (3  $\mu$ M strand concentration) in 50 mM Tris-HCl at pH 7.5 and 100 mM KCl was recorded on a UV-1800 Spectrometer (Shimadzu, JP) equipped with a TMSPC-8 controller and a 1 cm path-length cell. The absorbance of samples was monitored at 295 nm from 30 °C to 90 °C with heating of 1 °C/min.  $T_m$  value was calculated by median methods.

**Cell Viability Assay:** HeLa cells expressed RGGF were aliquoted in 24-well plates and treated in RPMI-1640 containing FBS (10%). We used the transiently transfection for the experiment after 48 h of incubation. Cell viability was assayed by the CellTiter-Glo cell viability assay (Promega, WI, USA) with Luminescencer PSN (model AB-2200-R; ATTO, Tokyo, JP), according to the manufacture's protocol.

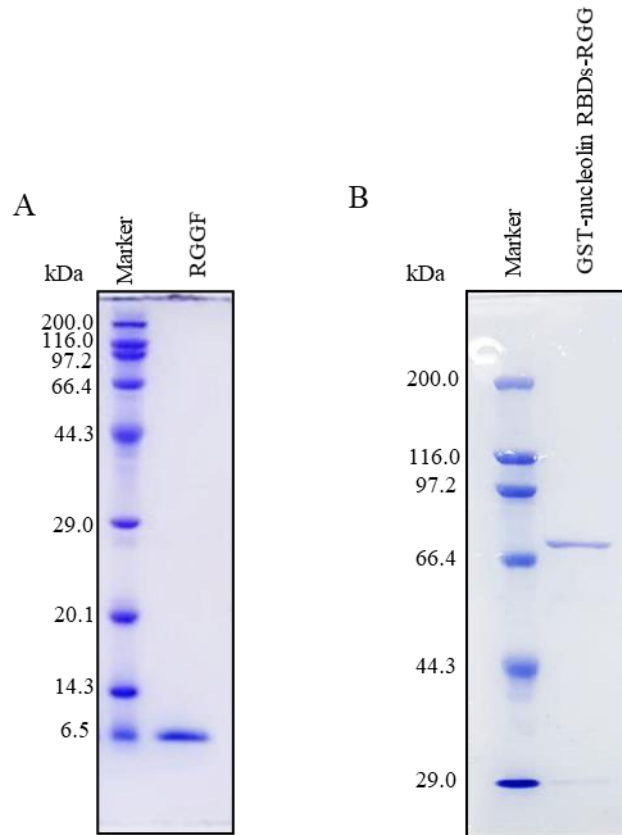

**Figure S1.** SDS-PAGE of RGGF and GST-nucleolin RBDs-RGG on 12 and 8 % polyacrylamide gel. *E. coli* strain BL21 (DE3) pLysS-competent cells were transformed with the vectors to express each proteins as GST-fused proteins. The proteins were purified by glutathione agarose and GST-tag of RGGF was digested by PreScission Protease. (A) Lane 1, molecular weight makers; Lane 2, RGGF (6.6 kDa). (B) Lane 1, molecular weight makers; Lane 2, GST-nucleolin RBDs-RGG (71 kDa). Molecular weight markers (kDa): pig myosin (200), *Escherichia coli* b-galactosidase (116), rabbit muscle phosphorylase B (97.2), bovine serum albumin (66.4), hen egg white ovalbumin (44.3), bovine carbonic anhydrase (29.0), soybean trypsin inhibitor (20.1), hen egg white lysozyme (14.3), bovine pancreas aprotinin (6.5).

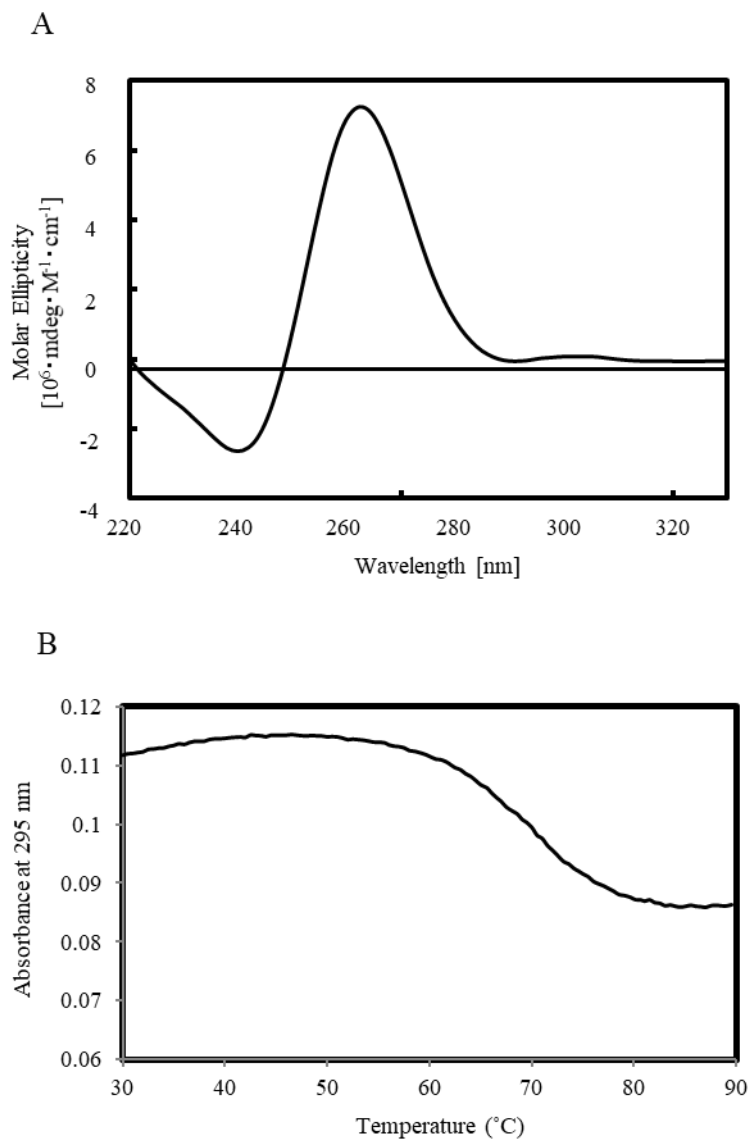

**Figure S2.** Circular dichroism (CD) spectrum and melting profile of Oligo 5. (A) CD spectrum of Oligo 5 in 100 mM KCl and 50 mM Tris-HCl (pH 7.5). The concentration of oligomer was 0.2 mM base concentration. (B) Melting profile obtained for Oligo 5 at 295 nm in 50 mM Tris-HCl at pH 7.5 and 100 mM KCl. The  $T_m$  of Oligo 5 is 70.4 °C. The concentration of oligomer was 3  $\mu$ M strand concentration.

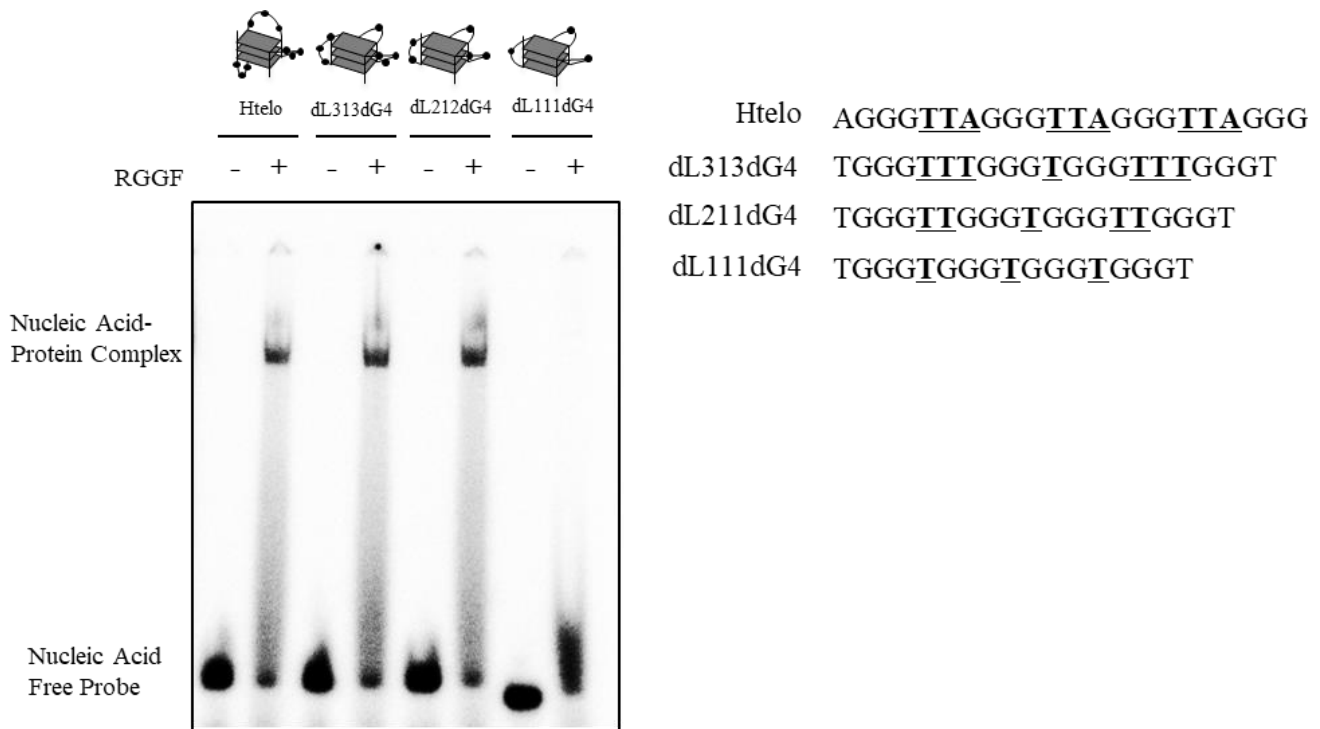

**Figure S3.** Effect of G4 loop length on the binding affinity of RGGF. The EMSA was performed using RGGF (lanes 2, 4, 6, and 8) with  $^{32}\text{P}$ -labeled Htelo (lanes 1 and 2), dL313dG4 (lanes 3 and 4), dL212dG4 (lanes 5 and 6), or dL111dG4 (lanes 7 and 8). The DNA-protein complexes were resolved by 6% polyacrylamide gel electrophoresis and visualized by autoradiography. Black circles in the cartoons of each G4 represent a nucleotide residue in the loops. The sequences of oligonucleotides used in EMSA are presented. The bases of the loops are underlined.

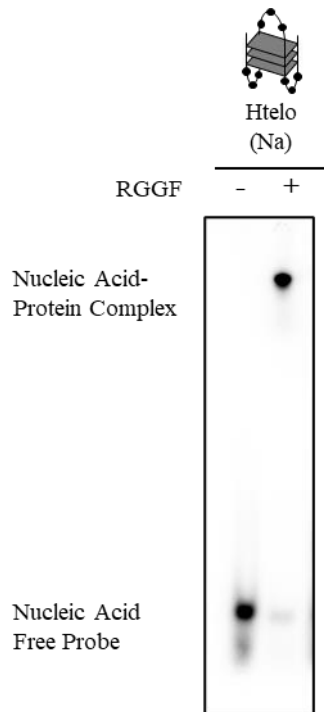

**Figure S4.** RGGF binding to Htelo fold in the presence of NaCl. EMSA was performed with RGGF (Lane 2) and  $^{32}\text{P}$ -labeled Htelo (1 and 2) fold in 50 mM Tris-HCl (pH 7.5) plus 100 mM NaCl. The DNA-protein complex was resolved by 6% polyacrylamide gel electrophoresis and visualized by autoradiography. Black circles in the cartoons of each G4 represent a nucleotides residue in the loops.

A

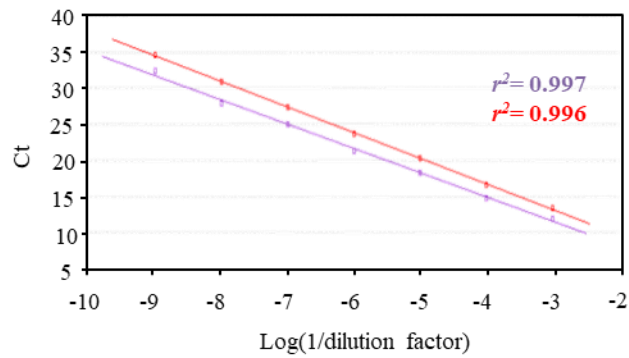

B

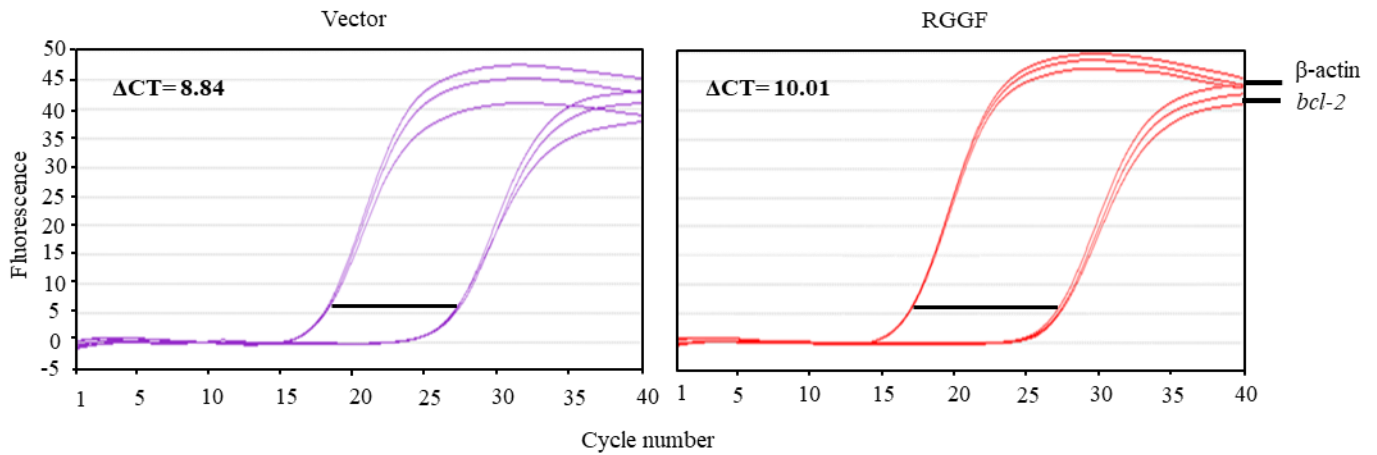

**Figure S5.** RT-qPCR amplification plots of  $\beta$ -actin and *bcl-2* from the vector or RGGF-overexpressing cells. (A) Standard curves of *bcl-2* (purple line) and  $\beta$ -actin (red line) based on the sample dilution factors ( $10^3$ ,  $10^4$ ,  $10^5$ ,  $10^6$ ,  $10^7$ ,  $10^8$ , and  $10^9$ ). The PCR efficiency was estimated through the linear regression of standard curve (*bcl-2*:  $r^2 = 0.997$ ;  $\beta$ -actin:  $r^2 = 0.996$ ). (B) Representative RT-qPCR amplification plots from the RNA samples of vector and RGGF-overexpressing HeLa cells. The purple line is vector-transfected HeLa cells, and the red line is RGGF-overexpressing HeLa cells.  $\Delta CT$ , average differences of CT values.

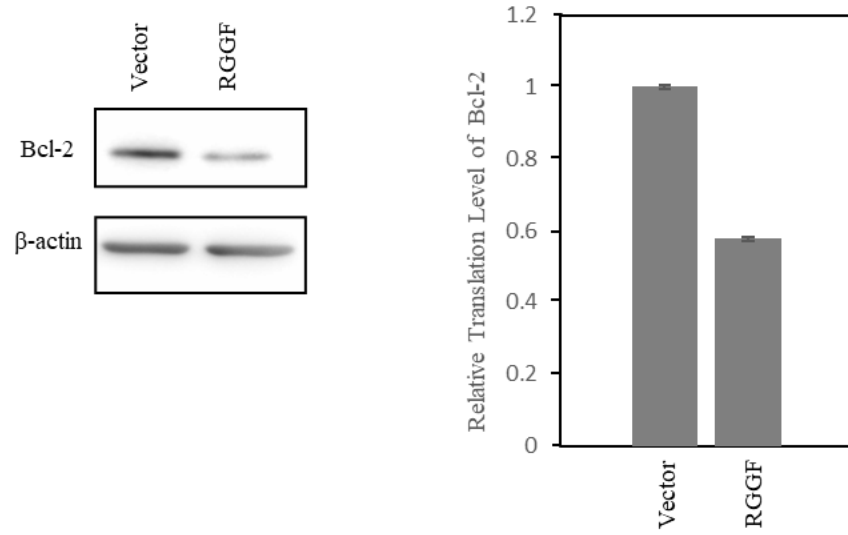

**Figure S6.** Translation level changes of Bcl-2 in RGGF-overexpressing HeLa cells. Relative translation level of Bcl-2 in RGGF-overexpressing HeLa cells was analyzed by Western blot with a Bcl-2 antibody. The translation levels of Bcl-2 and  $\beta$ -actin were analyzed with quantified. Bars represent mean values ( $\pm$  errors) obtained from 3 independent experiments.



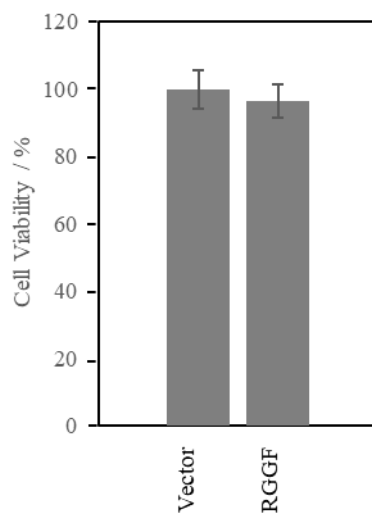

**Figure S7.** Cell viability assay. We used the transiently transfection of vector or RGGF for the experiment after 48 h of incubation. Cell viability was measured with a CellTiter-Glo luminescent kit. Bars represent mean values ( $\pm$  errors) obtained from three independent experiments.
